# Supplementary material for: Isolation, Identification and Pharmacological Effects of Mandragora autumnalis Fruit Flavonoids Fraction
Source: MDPI journal article supplement (doi:10.3390/molecules27031046), 2022-02-03
Supplement: s1 [file s1]

Supplementary Materials

# Isolation, Identification and Pharmacological Effects of *Mandragora autumnalis* Fruit Flavonoids Fraction

Nawaf Al-Maharik <sup>1,\*</sup>, Nidal Jaradat <sup>2,\*</sup>, Najlaa Bassalat <sup>3</sup>, Mohammed Hawash <sup>2</sup> and Hilal Zaid <sup>4</sup>

<sup>1</sup> Division of Chemistry, Faculty of Science, An-Najah National University, Nablus 00970, Palestine

<sup>2</sup> Department of Pharmacy, Faculty of Medicine and Health Sciences, An-Najah National University, Nablus 00970, Palestine; mohawash@najah.edu

<sup>3</sup> Department of Biology and Biotechnology, Faculty of Sciences, Arab American University, Jenin 240, Palestine; nbassalat@gmail.com

<sup>4</sup> Qasemi Research Center, Al-Qasemi Academic College, and Faculty of Medicine, Arab American University, Jenin 240, Palestine; hilal.zaid@gmail.com

\* Correspondence: n.maharik@najah.edu (N.A.-M.); nidaljaradat@najah.edu (N.J.)

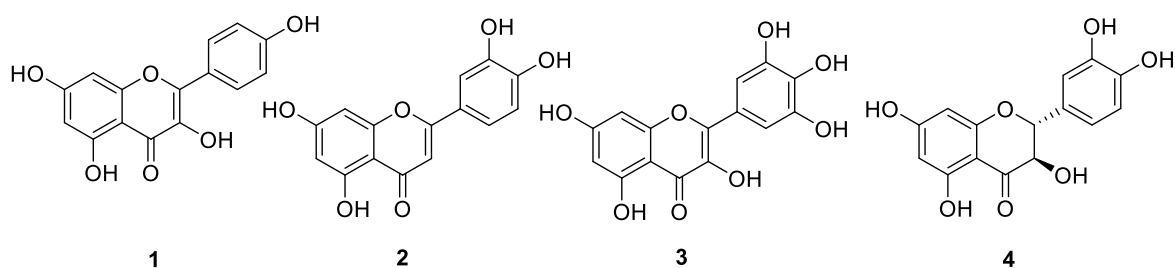

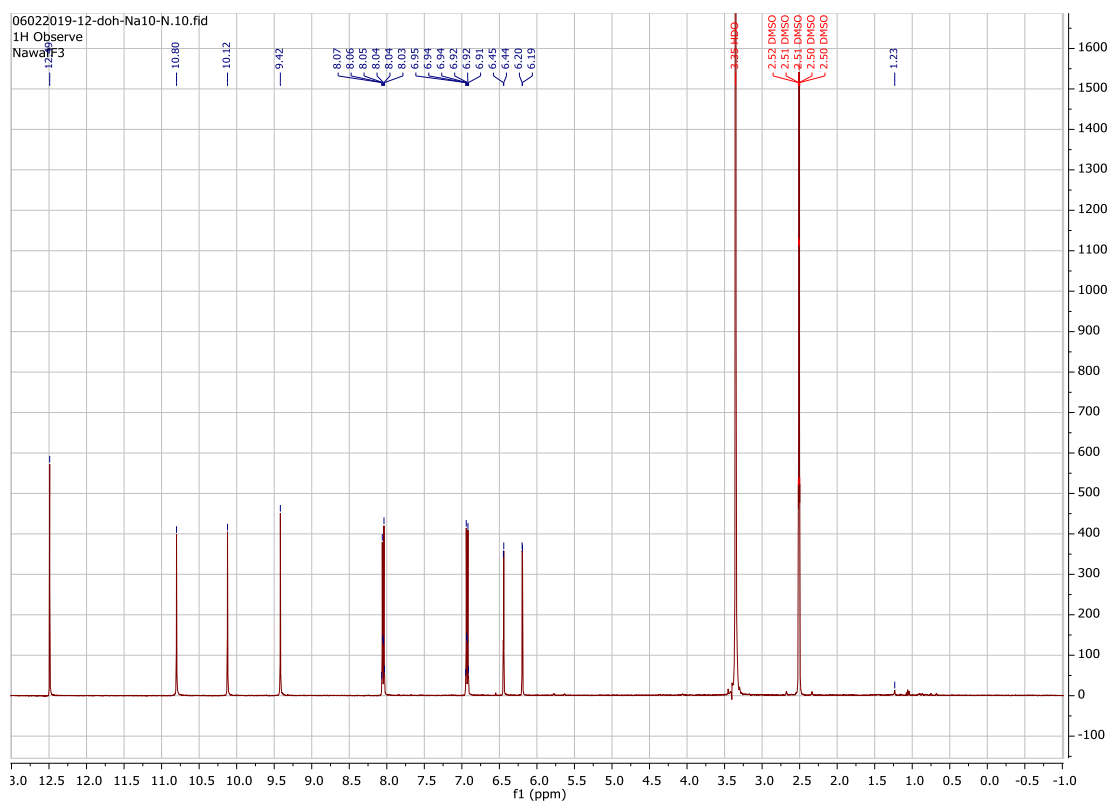

Figure S1.  $^1\text{H}$  NMR spectrum of **1** in  $\text{DMSO-d}_6$

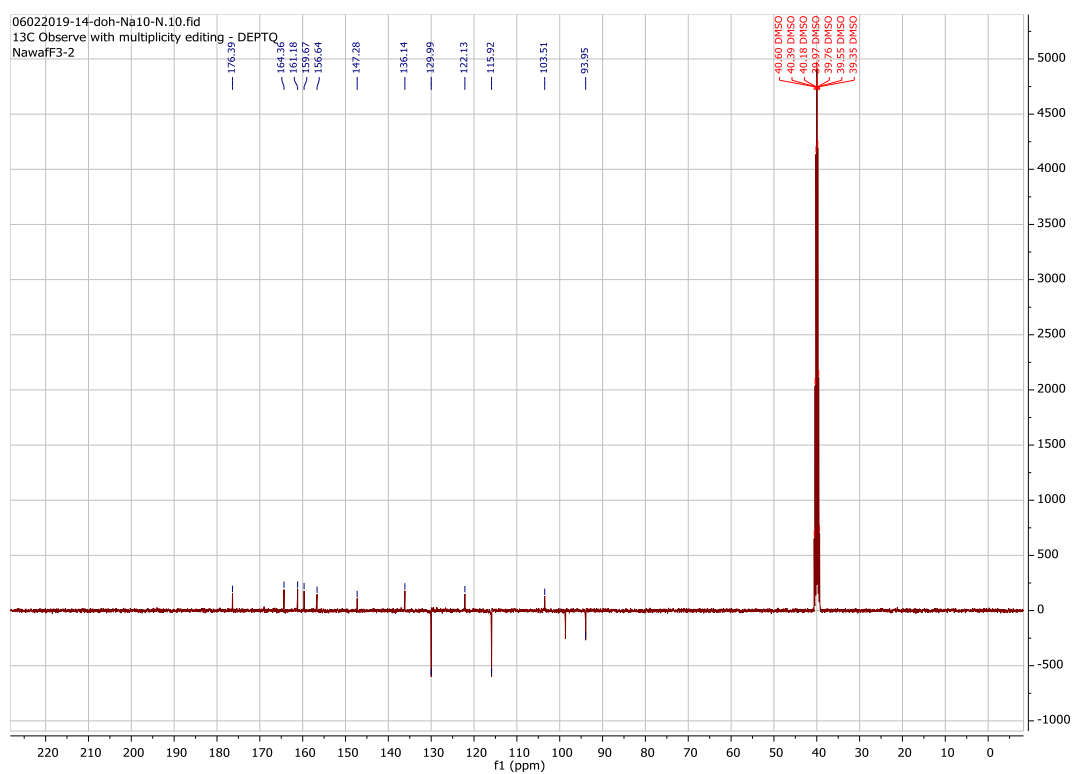

Figure S2.  $^{13}\text{C}$  NMR spectrum (400 MHz) of **1** in  $\text{DMSO-d}_6$

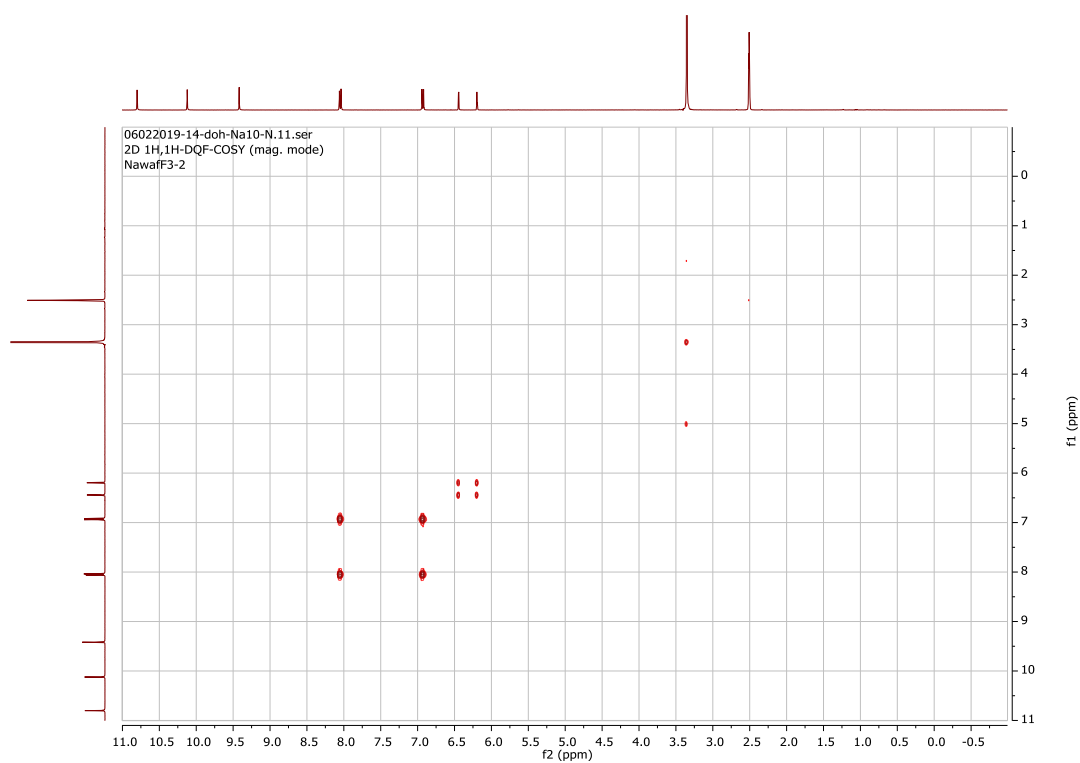

Figure S3.  $^1\text{H}$ - $^1\text{H}$  COSY spectrum of **1** in  $\text{DMSO-d}_6$

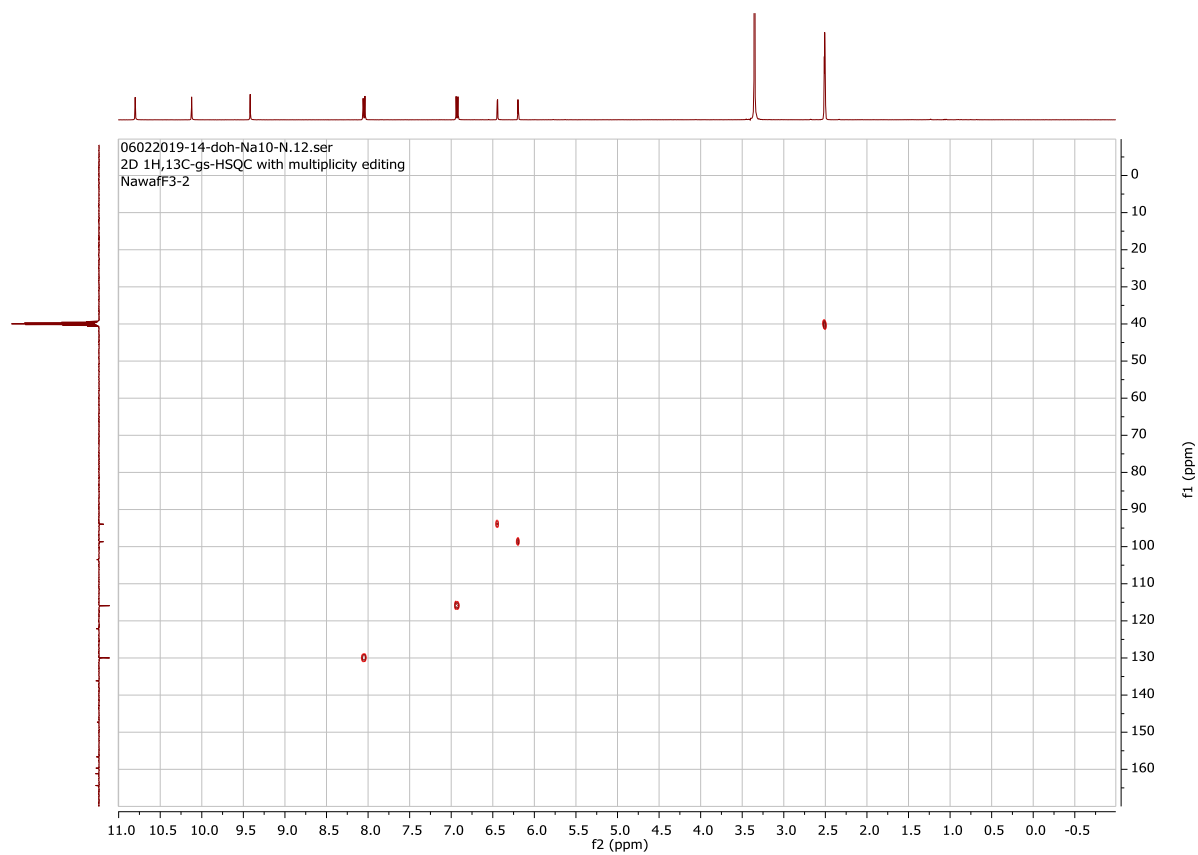

Figure S4. HSQC spectrum of **1** in  $\text{DMSO-d}_6$ .

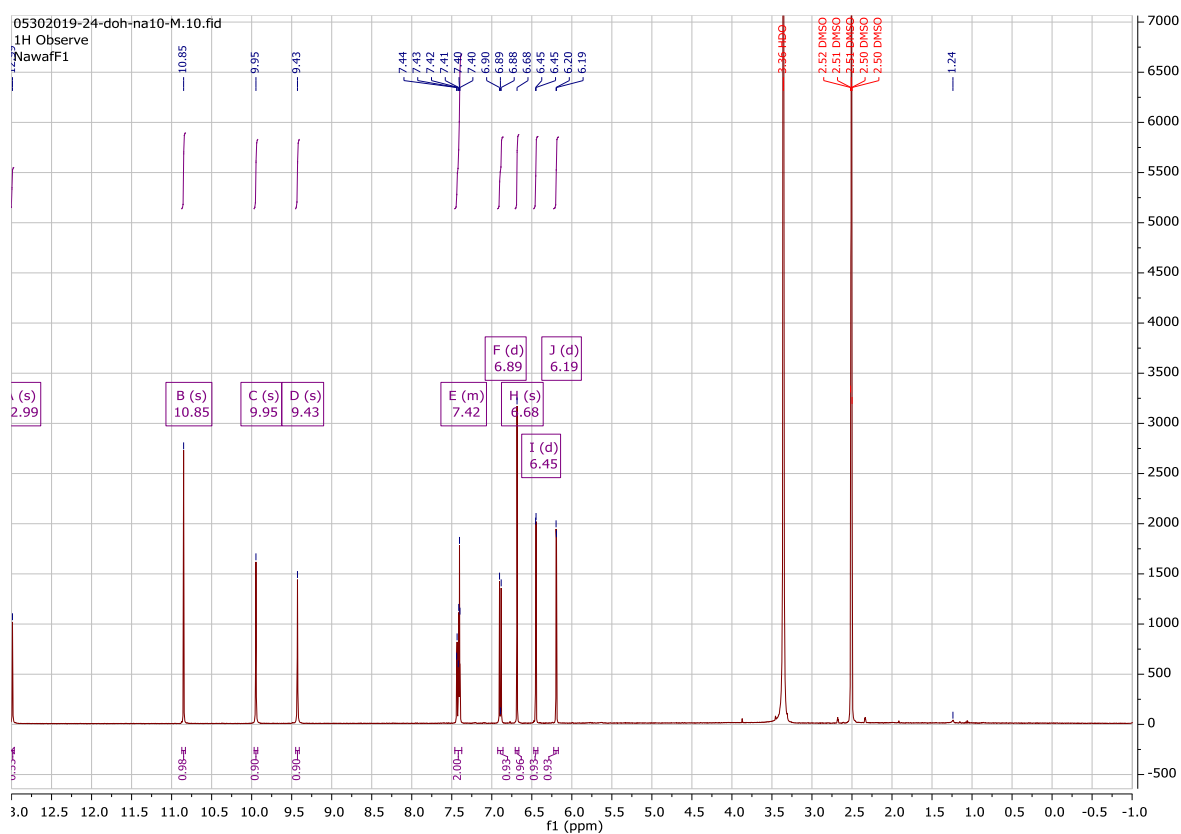

Figure S5.  $^1\text{H}$  NMR spectrum of **2** in  $\text{DMSO-d}_6$

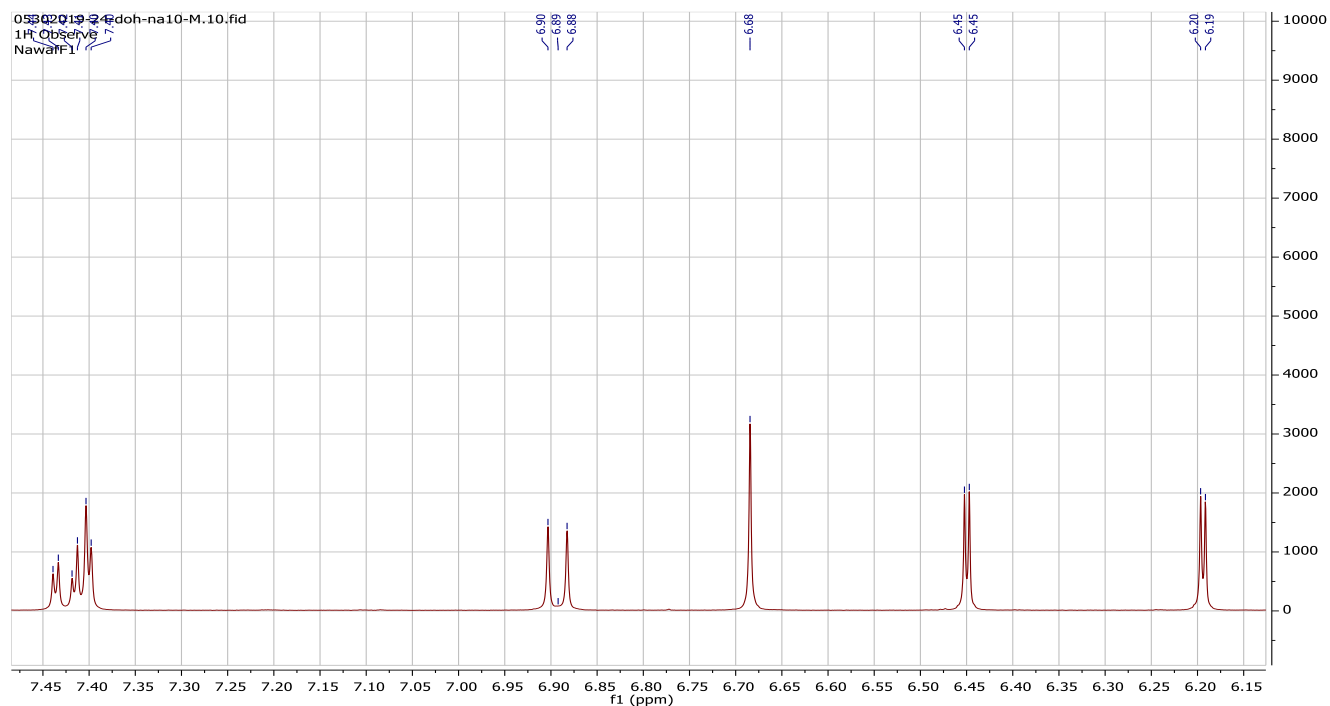

Figure S6. Expansion of the aromatic region of  $^1\text{H}$  NMR spectrum of **2** in  $\text{DMSO-d}_6$

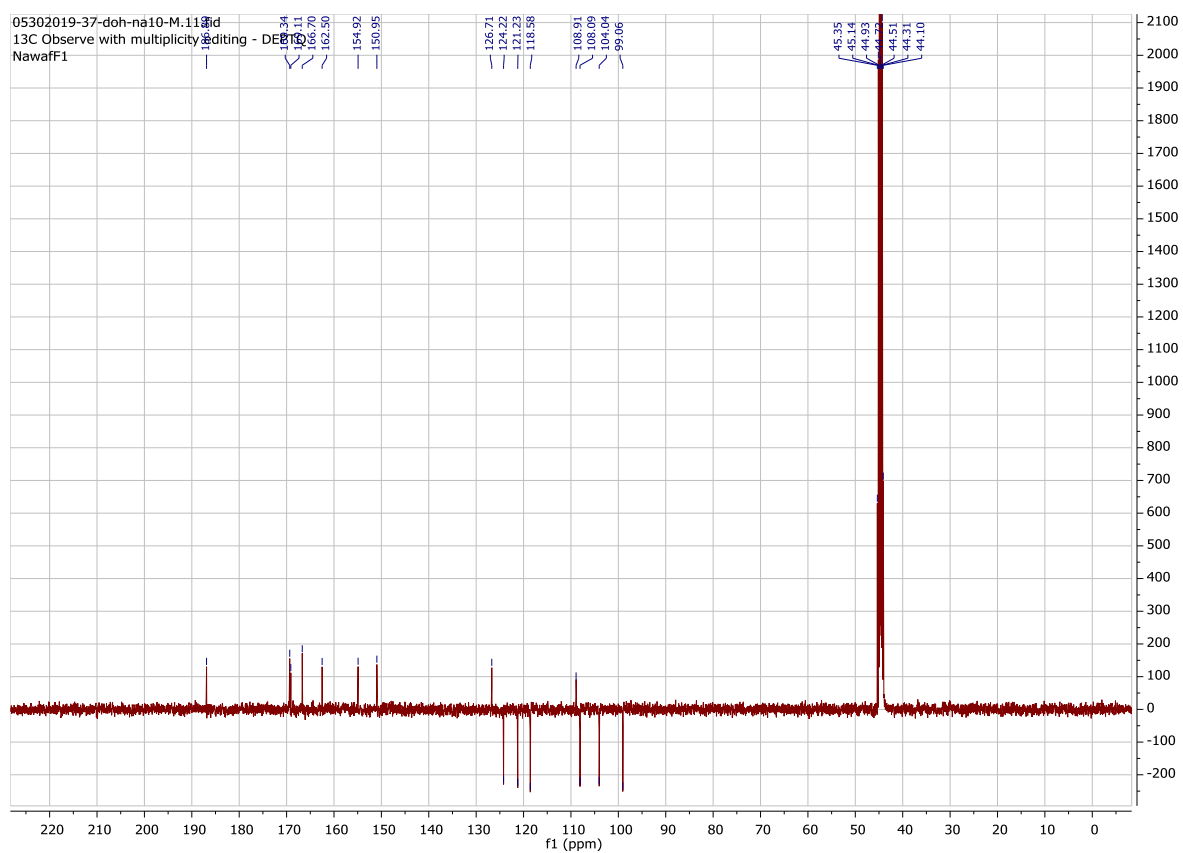

Figure S7.  $^{13}\text{C}$  NMR (DEPT) spectrum of **2** in  $\text{DMSO-d}_6$

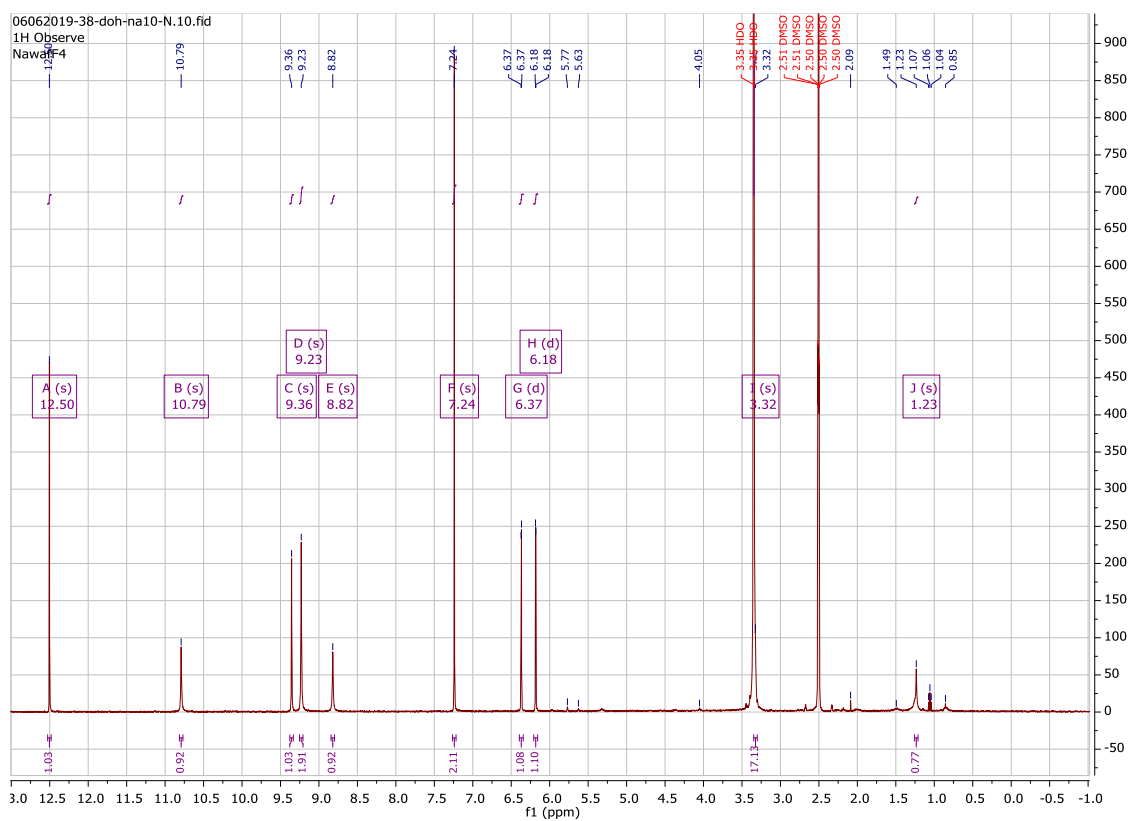

Figure S8.  $^1\text{H}$  NMR spectrum of **3** in  $\text{DMSO-d}_6$

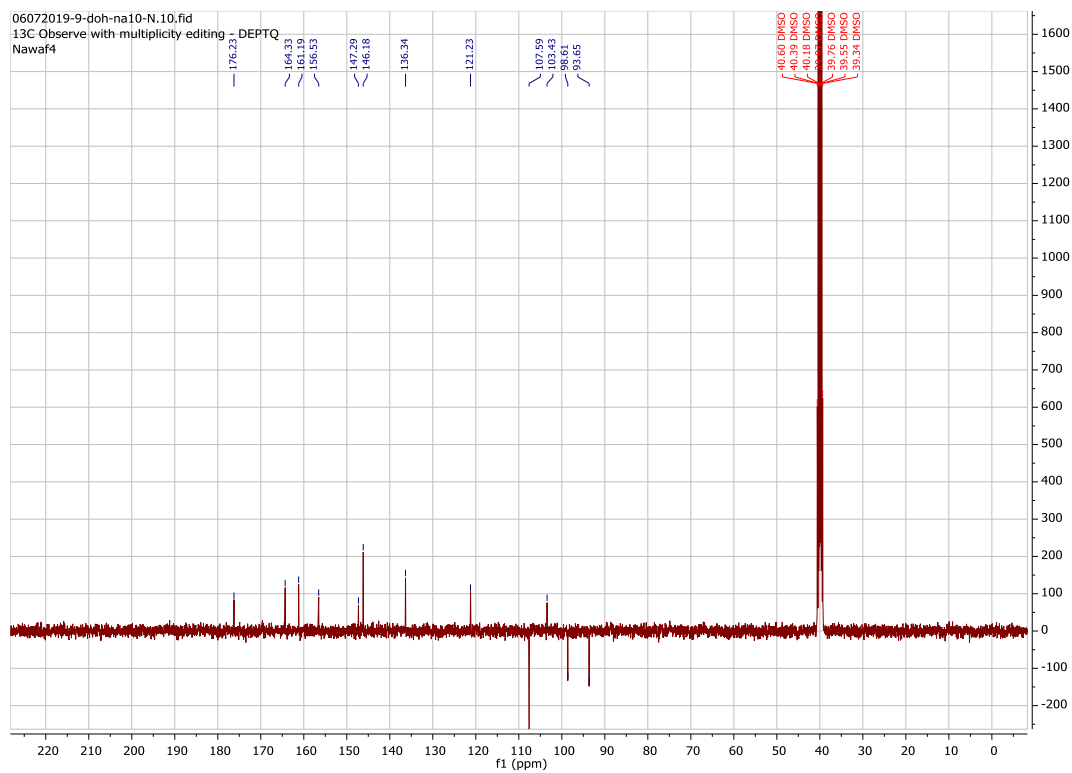

Figure S9.  $^{13}\text{C}$  NMR (Dept) spectrum of **3** in  $\text{DMSO-d}_6$

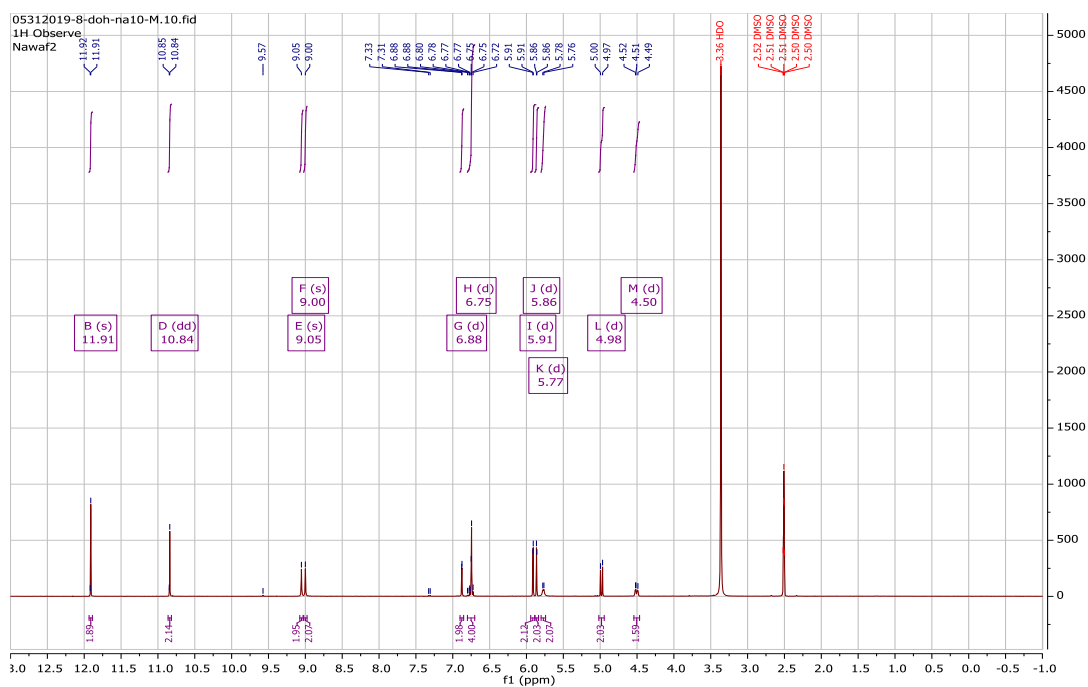

Figure S10. <sup>1</sup>H NMR spectrum of **4** in DMSO-d<sub>6</sub>

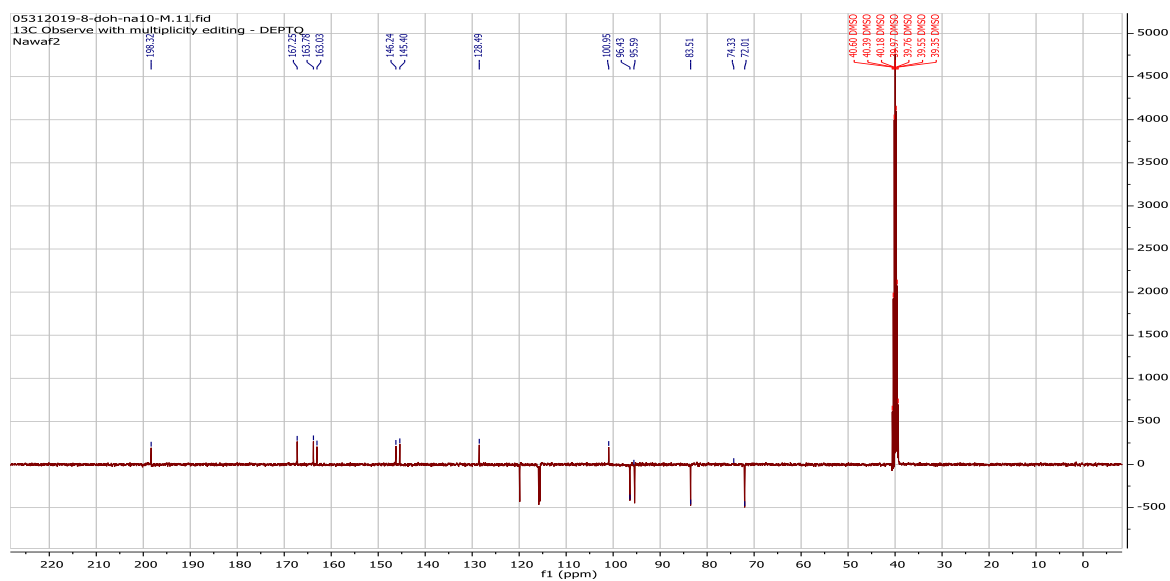

Figure S11. <sup>13</sup>C NMR (DEPT) spectrum of **4** in DMSO-d<sub>6</sub>

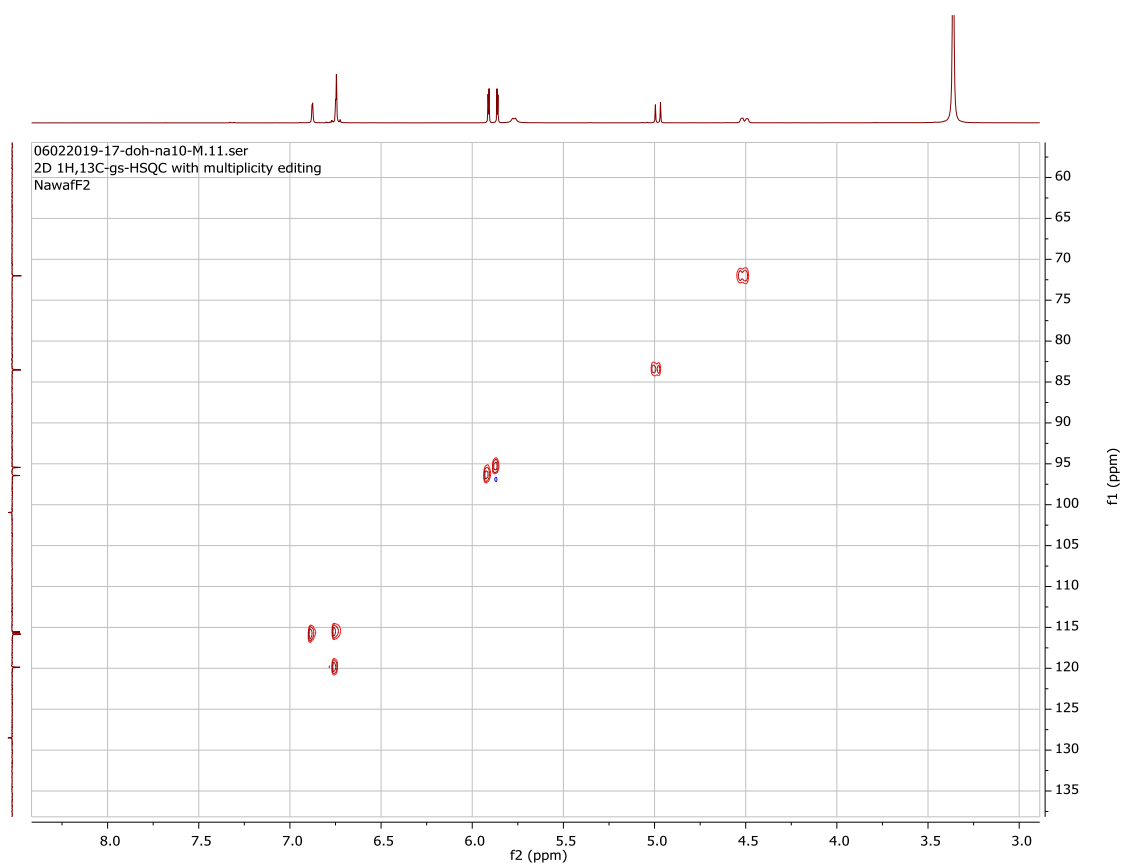

Figure S12. HSQC spectrum of **4** in DMSO- $d_6$

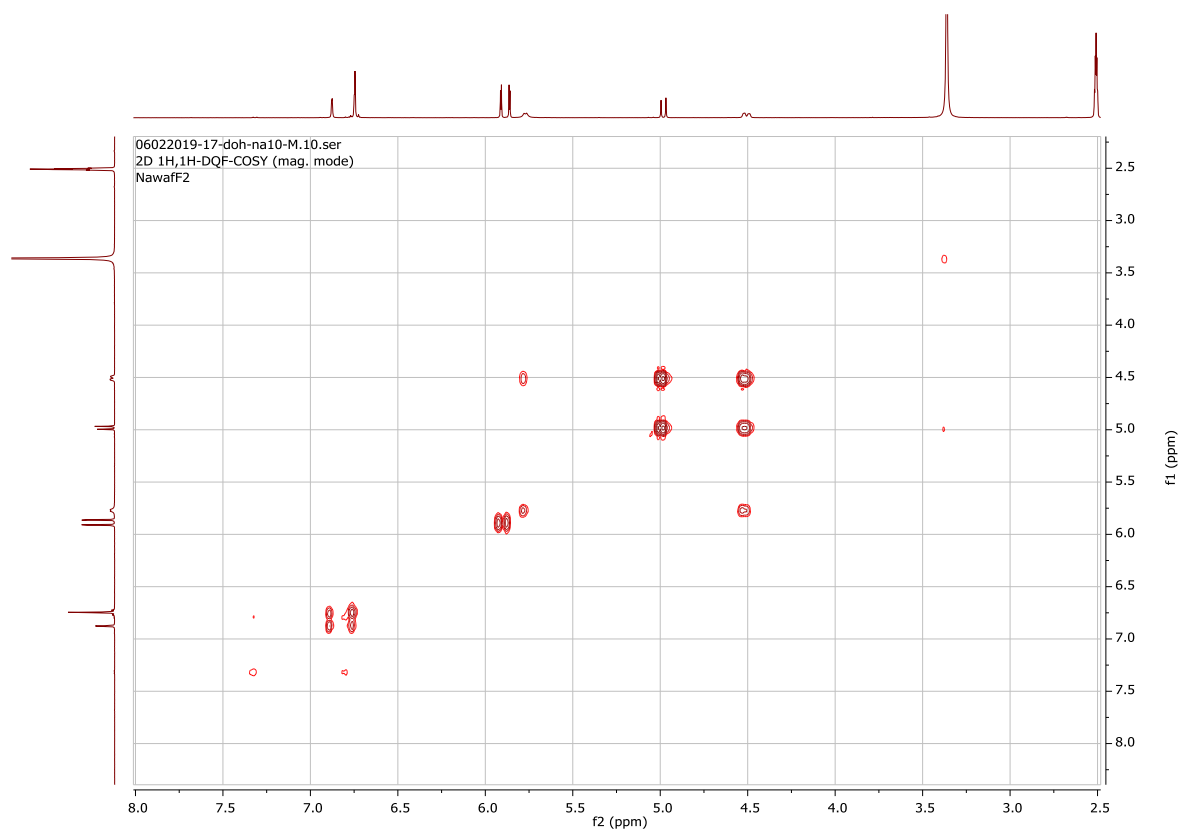

Figure S13.  $^1\text{H}$ - $^1\text{H}$  NMR spectrum of **4** in DMSO- $d_6$



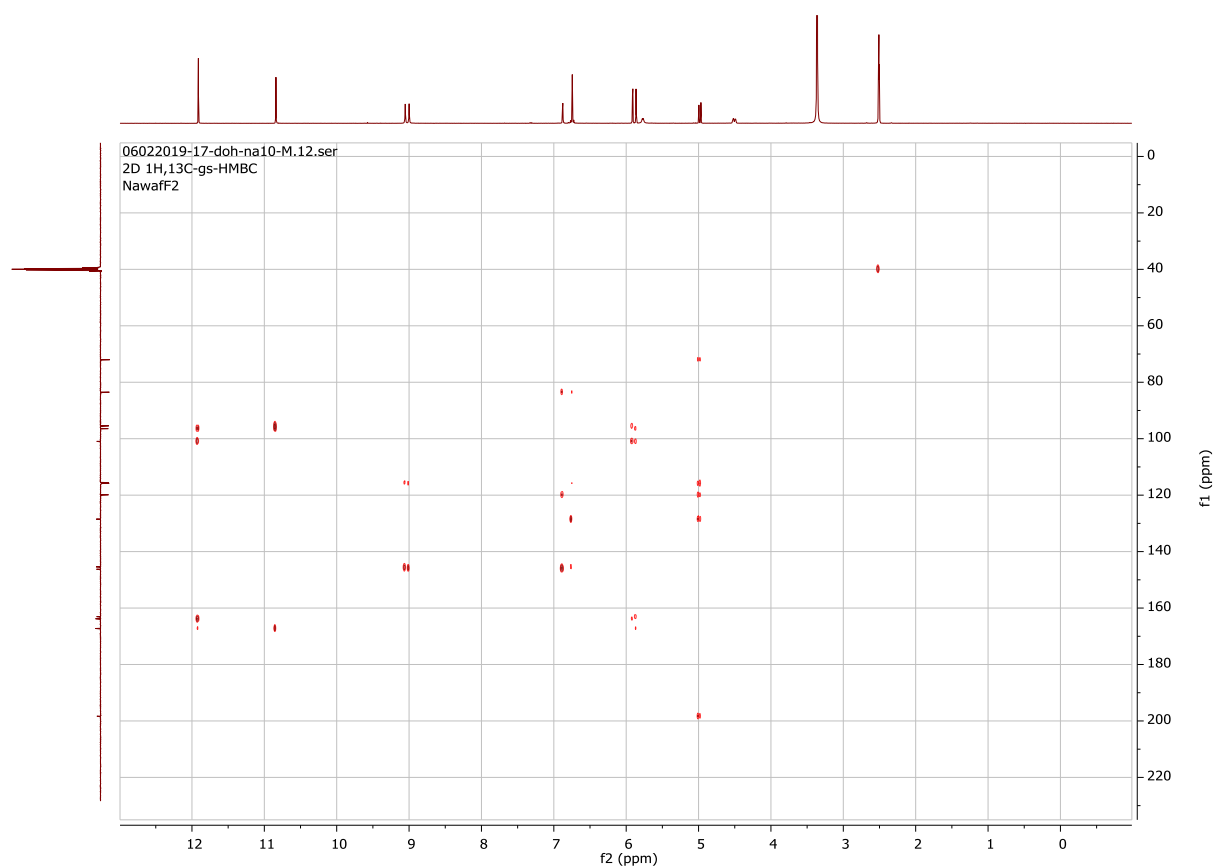

Figure S14. HMBC spectrum of **4** in DMSO-d<sub>6</sub>
